1 Oil palm expansion increases the vectorial capacity of dengue vectors in

2 Malaysian Borneo

3

4 **Nichar Gregory**

5 AFFILIATION: Department of Life Sciences, Imperial College London, Silwood Park,

6 Buckhurst Road, Ascot, Berkshire, SL5 7TJ, United Kingdom

7 ROLES: Conceptualization, Data curation, formal analysis, methodology, writing –

8 original draft

9 **Robert M. Ewers**

10 AFFILIATION: Department of Life Sciences, Imperial College London, Silwood Park,

11 Buckhurst Road, Ascot, Berkshire, SL5 7TJ, United Kingdom

12 ROLES: Conceptualization, methodology, writing – original draft

13 **Arthur Y. C. Chung**

14 AFFILIATION: Forest Research Centre, Forestry Department, PO Box 1407, 90715

15 Sandakan, Sabah, Malaysia

16 ROLES: writing – review & editing

17 **Lauren J. Cator**

18 AFFILIATION: Department of Life Sciences, Imperial College London, Silwood Park,

19 Buckhurst Road, Ascot, Berkshire, SL5 7TJ, United Kingdom

20 ROLES: Conceptualization, methodology, writing – original draft

21

22 ABSTRACT

23 Changes in land-use and the associated shifts in environmental conditions can have large effects  
24 on the transmission and emergence of disease. Mosquito-borne disease are particularly sensitive  
25 to these changes because mosquito growth, reproduction, survival and susceptibility to infection  
26 are all thermally sensitive traits, and land use change dramatically alters local microclimate.  
27 Predicting disease transmission under environmental change is increasingly critical for targeting  
28 mosquito-borne disease control and for identifying hotspots of disease emergence. Mechanistic  
29 models offer a powerful tool for improving these predications. However, these approaches are  
30 limited by the quality and scale of temperature data and the thermal response curves that  
31 underlie predictions. Here, we used fine-scale temperature monitoring and a combination of  
32 empirical, laboratory and temperature-dependent estimates to estimate the vectorial capacity of  
33 *Aedes albopictus* mosquitoes across a tropical forest – oil palm plantation conversion gradient  
34 in Malaysian Borneo. We found that fine-scale differences in temperature between logged forest  
35 and oil palm plantation sites were not sufficient to produce differences in temperature-  
36 dependent trait estimates using published thermal performance curves. However, when  
37 measured under field conditions a key parameter, adult abundance, differed significantly  
38 between land-use types, resulting in estimates of vectorial capacity that were 1.5 times higher in  
39 plantations than in forests. The prediction that oil palm plantations would support mosquito  
40 populations with higher vectorial capacity was robust to uncertainties in our adult survival  
41 estimates. These results provide a mechanistic basis for understanding the effects of forest  
42 conversion on mosquito-borne disease risk, and a framework for interpreting emergent  
43 relationships between land-use and disease transmission. As rising demand for palm oil  
44 products drives continued expansion of plantations, these findings have important implications  
45 for conservation, land management and public health policy at the global scale.

## 46 AUTHOR SUMMARY

47 The large scale modification of landscapes by humans has contributed to the rise of emerging  
48 and re-emerging mosquito-borne diseases. While the association between anthropogenic land-  
49 use change and these shifts in disease risk are frequently observed, our understanding of exactly  
50 how land-use change mechanistically alters disease risk remains unclear. Changes in local  
51 environmental conditions (e.g. temperature) may play an important role, due to the effects on  
52 mosquito life-history, but are rarely measured at scales relevant these small-bodied ectotherms.  
53 Here we measure the impact of tropical forest conversion to oil palm plantation on each of the  
54 components that determine the potential for mosquitoes to transmit pathogens (vectorial  
55 capacity). By combining fine-scale temperature data from the field, published temperature  
56 responses of mosquitoes and field data on adult mosquito populations, we show that land-use  
57 change from forest to plantation can be expected to increase vectorial capacity by 150%. Our  
58 results highlight the need to advance field research into fundamental mosquito ecology, and to  
59 more critically evaluate the increased risk of *Aedes*-borne disease in dynamic working  
60 landscapes against the benefits of economic development.

61

## 62 1. BACKGROUND

63 More than 80% of the global population is at risk of being infected with a mosquito-borne  
64 disease (WHO 2017). Dengue virus, the most prevalent of the mosquito-borne diseases, is  
65 estimated to infect 390 million people annually (Bhatt *et al.* 2013), and two previously obscure  
66 arboviruses, Zika and chikungunya virus, infected over 1 million people between 2016 and 2017  
67 (WHO 2017). Climate and environmental change (e.g. land-use) have been implicated as drivers  
68 of mosquito-borne disease emergence (1, 2) due to the temperature sensitivity of parasite and  
69 mosquito traits underlying transmission. However, the mechanisms by which environment  
70 influences transmission dynamics remain poorly characterised.

71           Efforts to identify environmental drivers of disease have historically relied on statistical  
72 approaches that link environmental data to disease prevalence, or on occurrence mapping of the  
73 mosquito vectors (3, 4). Whilst useful for identifying broad, correlative patterns of disease  
74 incidence, these models don't explicitly incorporate biological mechanisms, and are thus limited  
75 in their capacity to address non-linear feedback pathways, spatiotemporal heterogeneities and  
76 complex transmission dynamics (5). Mechanistic models that incorporate mosquito and parasite  
77 life-history into a mathematical framework for transmission have shown promise. For example,  
78 the vectorial capacity model, which incorporates both mosquito and pathogen traits to estimate  
79 the total number of potentially infectious bites that would eventually arise from all the mosquitoes  
80 biting a human on a single day explicitly (Garrett-Jones, 1964). A key limitation of these  
81 mechanistic approaches has been a lack of data on the key entomological parameters (7, 8).

82

83           Mosquitoes are small-bodied ectotherms and their physiology is closely linked to ambient  
84 environmental conditions (9). Temperature affects all components of vectorial capacity: mosquito  
85 density, by determining rates of mosquito demographic traits, such as growth, survival and  
86 reproduction (10-12), biting rate (13, 14), vector competence (15, 16), and the pathogen extrinsic  
87 incubation period (17, 18). Naturally the vast majority of studies have focused on this source of  
88 variation (19). Temperature has most recently been incorporated into mechanistic models using  
89 thermal performance curves (TPCs) (20-22).

90           The temperature dependence of mosquito traits is typically assessed under laboratory  
91 conditions, where the response of a relevant trait is measured across a range of constant  
92 temperatures and yields a curve where performance increases slowly with temperature to a  
93 maximum level then rapidly declines (11, 23, 24). However, mosquitoes are subject to daily  
94 temperature fluctuations in the field, and a growing body of work demonstrates that these

95 variations can produce trait responses that differ to those derived under constant conditions (25,  
96 26)

97 Similarly, the environmental data used to drive transmission models is often coarse in  
98 scale, such as average monthly temperatures or broad categories of land-use. These data are  
99 unlikely to represent the realised environments of mosquitoes or their pathogens, and the  
100 mismatch between the underlying biological processes driving transmission and covariates can  
101 have profound effects on predictions for transmission (7, 21, 27, 28).

102 Fine-scale heterogeneity in landscape structure can significantly increase the disparity  
103 between available environmental data and actual environmental conditions (Jucker *et al.* 2011;  
104 Cator *et al.* 2013). For example, the temperature data underpinning many disease transmission  
105 models is obtained from the WorldClim2 database, which uses data interpolated from weather  
106 stations located in open areas, and has a resolution of approximately 1km. In contrast, vegetation  
107 structure mediates microclimates such that temperatures under dense canopy can be  $\sim 2\text{-}3^\circ\text{C}$   
108 cooler than in open areas (29, 30) and are highly heterogeneous over small spatial scales. These  
109 differences are even greater when compared to satellite estimates of local temperatures, with one  
110 study finding that within-forest temperatures differ from satellite estimates by  $5\text{-}10^\circ\text{C}$  (31).  
111 Similarly, land cover data from satellite-based remote sensing (e.g. Landsat) are typically  
112 available at a resolution of 15-60 m, and suffers from high cloud cover in the tropics (32).

113 Characterising the dynamics of tropical environments is particularly important because  
114 they both experience some of the highest rates of anthropogenic land-use change (33) and bear  
115 significant and increasing morbidity and mortality due to mosquito-borne diseases (34). For  
116 example, an increase in demand for African oil palm (*Elaeis guineensis*) products has resulted in  
117 the dramatic expansion of industrial plantations in the last 20 years (35). More than 80% of global  
118 palm oil is produced in Malaysia and Indonesia (36). Conversion has been at the expense of either  
119 selectively logged or old growth forest (37). The effects of land-use change on arbovirus

120 transmission in this region remain largely unexplored, despite observations that the abundance  
121 of *Aedes albopictus*, an important arbovirus vector, increases following forest conversion (38, 39).  
122 This aggressive, day-biting mosquito is native to the forests of Southeast Asia and considered an  
123 important vector of the dengue virus and a potential bridge vector for emerging pathogens (40-  
124 42). There has been a dramatic increase in the intensity and magnitude of dengue outbreaks in  
125 Malaysia over the last few decades (43, 44). The majority of recent cases were reported from  
126 Selangor state, the most populous state in peninsular Malaysia, however, an increasing number  
127 of sub-urban and rural cases have been reported (40). Notably, in 2007 a fifth dengue virus  
128 serotype was isolated from an outbreak in the Bornean state of Sarawak. The serotype was  
129 identified as a member of a sylvatic lineage of DENV-2, representing the first identification of a  
130 sylvatic DENV circulating in Asia since 1975 (Normile 2013).

131 We used a mechanistic approach to investigate how tropical forest conversion will affect  
132 the vectorial capacity of *Ae. albopictus* mosquitoes. We directly measured *Ae. albopictus* survival,  
133 and abundance in forest and oil palm sites. We then measured the effect of thermal environment  
134 on adult gonotrophic cycle length by subjecting females to field thermal conditions in a controlled  
135 experiment. These measures were then combined to parameterise a dengue-specific vectorial  
136 capacity model to investigate differences in transmission potential between land-use types. We  
137 also estimated adult survival and abundance from published TPCs to determine if these  
138 predictions differed to our field data. Based on our data, vectorial capacity was estimated to be  
139 greater in oil palm plantation than in forest, largely driven by greater mosquito abundance in oil  
140 palm. This key difference between land-use types was not predicted by commonly used TPCs. Our  
141 results suggest that oil palm conversion may be an important driver of *Aedes*-borne disease  
142 emergence.

143

144

## 145 2. Methods

### 146 2.1 Study site

147 Fieldwork was conducted at sites within the Stability of Altered Forest Ecosystems (SAFE)  
148 Project, a large-scale deforestation and forest fragmentation experiment located within lowland  
149 dipterocarp forest regions of East Sabah in Malaysian Borneo (4°33'N, 117°16'E; Ewers et al 2011).  
150 Climate in the region is typically aseasonal (Walsh & Newbery 1999), with occasional droughts  
151 that are often, but not always, associated with the positive phase of ENSO events (46). The logged  
152 forest sites have undergone two rounds of selective logging since 1978, and have a mean  
153 aboveground biomass (ABG) of 122.4 t/ha (47). Logging intensity in this area varies considerably,  
154 however most stands are heavily degraded and are characterised by a paucity of commercial  
155 timber species, few emergent trees and the dominance of pioneer and invasive vegetation (Pfeifer  
156 *et al.* 2016) . Oil palm plantations were established in 2006 (Ewers *et al.* 2011) and are  
157 characterised by monocrop stands of closed or nearly-closed canopy oil palm. The plantation sites  
158 have considerably lower plant biomass than the forest sites (ABG = 38.1 t/ha; Pfeifer *et al.* 2016).  
159 Mean altitude across the sampling points is 450m (median = 460m, interquartile range = 72m).  
160 Further details of the sites are available in the electronic Supplementary materials (S1).

161

### 162 2.2 Fine-Scale Temperature Data

163 Hourly temperature data were collected during the same period from nine field sites in each of  
164 logged forest and oil palm plantations (N = 18; Gregory *et al.* 2019). These data were collected  
165 using Data Loggers ERL-USB-2 (LASCAR electronics, Salisbury) secured to small wooden posts  
166 at a height of 5 cm, and shaded from rain and direct sunlight with plastic plates suspended  
167 approximately 30 cm above each post.

168

169 2.3 Adult mosquito collection

170 We directly measured adult mosquito density from four human settlements. Two of these were  
171 located within logged forest and two were located within oil palm sites. Host-seeking mosquitoes  
172 were collected using the human landing catch (HLC) method, where a collector (NG) sat with their  
173 limbs exposed and aspirated mosquitoes as they attempted to feed. Sampling was conducted at  
174 each site between February and April in both 2017 and 2018. Collections were carried out for up  
175 to three consecutive days, at least twice per site between 10:00 to 12:00. The collector was trained  
176 in the HLC method prior to involvement in the project and their health monitored for three weeks  
177 following collections.

178

179 2.3 Estimating mosquito survival

180 Adult survival was estimated using the proportion of host-seeking females that were found to have  
181 laid one or more batches of eggs (48). Female mosquitoes collected during HLCs were  
182 immobilised in a freezer and then had their ovaries removed for observation of the tracheole coils,  
183 following Detinova (1962). Nulliparous mosquitoes have tightly coiled ovarioles that become  
184 irreversibly distended during the passage of eggs, creating bead-like dilatations. The population  
185 of adult females is thus split into two age groups representing young and old individuals. Adult  
186 survival ( $s$ ) can then be estimated using the equation:

187

188

$$s = M \frac{1}{i_0} \quad 1$$

189

190 where  $M$  is the parous rate of the sampled population and  $i_0$  is the length of the first gonotrophic  
191 cycle (Macdonald 1952c; Davidson 1954).



192 To determine gonotrophic cycle length ( $i_o$ ) *Ae. albopictus* larvae were experimentally reared in  
193 incubators (Panasonic MLR-350H). Eggs between 2-4 weeks old were hatched in dechlorinated  
194 water over a period of 36 hours. First instar larvae were reared at a density of 50 larvae per cup  
195 and provisioned with five pellets of fish food (*Tetra Cichlid Colour*<sup>TM</sup>) daily. Developing larvae  
196 were exposed to temperature treatments simulating mean hourly diurnal temperatures  
197 empirically recorded in either logged forest (mean = 24 °C, range = 6 °C) or oil palm plantation  
198 (mean = 24 °C, range = 4 °C) sampling sites (Gregory *et al.* 2019) or a control treatment where  
199 temperature was held constant (24 °C). Temperature data and rearing protocol are described in  
200 further detail in the electronic supplementary materials (S2). Upon emergence, male and female  
201 adults were housed together to allow for mating, and provisioned with 10 % sugar solution *ad*  
202 *libitum*. Females were offered defibrinated horse blood via a Hemotek feeding system three days  
203 after emergence. Mosquitoes that did not fully engorge were removed from the fecundity  
204 experiments. Mosquitoes that failed to feed were offered a bloodmeal each day until a successful  
205 feed was achieved or until four additional days had passed. Blood-fed females were transferred  
206 into individual laying tubes (2.9cm x 11.7cm) containing damp filter paper as an egg laying  
207 substrate. Papers were observed every day for the presence of eggs, and the length of the pre-  
208 bloodmeal period as well as the first gonotrophic cycle were recorded. The first gonotrophic cycle  
209 period was used as an estimate of average gonotrophic cycle length when calculating survival (49),  
210 as only one bloodmeal was provided.

211

### 212 2.3 Estimating mosquito density based on published thermal performance data

213 We used our fine-scale data to approximate mosquito density using a method used in a number  
214 of other VBD studies (7, 8, 20, 50). Here adult density is estimated using the equation:

215

$$m = \frac{EFD \cdot p_{EA} \cdot MDR}{\mu^2} \quad 2$$

216

217 where the parameters are the number of eggs laid per female per day (*EFD*), the egg to adult  
218 survival probability (*p<sub>EA</sub>*), the larval development rate (*MDR*), and adult daily probability of  
219 mortality ( $\mu$ ) (51). Trait values were estimated using temperature-dependent trait response  
220 curves from Mordecai *et al.* (2017), combined with the fine-scale temperature data collected from  
221 the field. Rate summation was then used to incorporate the effects of diurnal temperature  
222 fluctuation by estimating trait responses at each hour throughout the day and summing the  
223 proportional hourly changes (52, 53).

224

## 225 2.5 Estimating vectorial capacity

226 Vectorial capacity was estimated using a dengue specific framework:

227

$$VC = \frac{m \cdot a^2 \cdot b \cdot c \cdot e^{\frac{-\mu}{REI}}}{-\mu} \quad 3$$

228

229 where *m* denotes vector to human ratio, *a* is the daily probability of a female mosquito taking a  
230 bloodmeal,  $\mu$  is the daily probability of adult mortality, *b* is the probability of transmission from  
231 an infectious mosquito to a susceptible human, *c* is the probability of transmission from an  
232 infectious human to susceptible mosquito, and *REI* is the rate of extrinsic incubation of the  
233 pathogen.

234 We parameterized this model using a combination of our field-collected data on mosquito life  
235 history and abundance (Table 1) and estimates derived from published TPCs. Mosquito density  
236 and survival were measured in the field, and female biting rate was taken as the inverse of the  
237 gonotrophic cycle length derived from our laboratory experiments (10, 20). Parameters that were  
238 not measured in this study ( $REI$ ,  $b$ ,  $c$ ) were estimated using field-collected temperature data and  
239 rate summation as described above. As mosquito density ( $m$ ) scales proportionally with vectorial  
240 capacity, omitting abundance from the vectorial capacity equation allows us to compare the  
241 relative contributions of an individual mosquito inhabiting logged forest and oil palm plantation  
242 to transmission. We calculated this relative vectorial capacity ( $rVC$ , the vectorial capacity relative  
243 to the vector : human population ratio) for each of the sites.

244

## 245 2.6 Sensitivity of vectorial capacity estimates to mortality and biting rate

246 Vectorial capacity is especially sensitive to variation in adult mosquito survival and biting rate. To  
247 explore the impact of uncertainty in survival estimates derived from our field data, we recalculated  
248 vectorial capacity for every combination of daily probability of survival and of biting rate in the  
249 two land-use types at increments of 0.01, while holding all other parameters constant. We used a  
250 contour plot to visualize how differences in relative survival affected transmission potential.

251

252

253

## 254 **Table 1. Traits and data sources for vectorial capacity parameters**

---

| Trait | Symbol | Source |
|-------|--------|--------|
|-------|--------|--------|

---

---

|                                                                                |       |                                                                                                              |
|--------------------------------------------------------------------------------|-------|--------------------------------------------------------------------------------------------------------------|
| Vector density                                                                 | $m$   | Measured directly in field collections                                                                       |
| Daily probability of a female mosquito taking a bloodmeal                      | $a$   | Calculated from laboratory experiments                                                                       |
| Probability of transmission from an infectious mosquito to a susceptible human | $b$   | Mordecai <i>et al.</i> (2017) temperature-dependent estimates combined with field-collected temperature data |
| Probability of transmission from an infectious human to a susceptible mosquito | $c$   | Mordecai <i>et al.</i> (2017) temperature-dependent estimates combined with field-collected temperature data |
| Extrinsic incubation rate of the pathogen                                      | $REI$ | Mordecai <i>et al.</i> (2017) temperature-dependent estimates combined with field-collected temperature data |
| Daily probability of adult mortality                                           | $\mu$ | Estimated from field parity assessments and gonotrophic cycle length determined in laboratory experiments    |

---

255

256

257

## 258 2.7 Statistical analysis

259 All analyses were carried out in R Version 3.5 (R Core Team 2014). A generalised linear negative  
260 binomial model (link = log; R package MASS; Venables 2002), with land-use type set as a  
261 predictor was used to compare the number of host-seeking mosquitoes collect in HLCs between  
262 oil palm plantations and logged forest sites. Sampling site and year were initially nested as  
263 random effects, but neither was significant in the model so were excluded from the final model.  
264 To calculate survival, parous rates were compared between land-use type and sampling years  
265 using a generalised linear model (family = Gamma, link = “log”). Laboratory data on gonotrophic

266 cycle length were compared using the same model structure with the length of the first  
267 gonotrophic cycle in days set as the response variable and experimental treatment (forest or  
268 plantation microclimatic conditions) set as the predictor. Adult survival was then calculated from  
269 mean parous rate and gonotrophic cycle using Equation 4 . Mean trait estimates for each land-  
270 use type were then used to calculate vectorial capacity at each location for which there was  
271 temperature data (N = 18). If the point estimates for each trait did not differ significantly between  
272 land-use types, we took the conservative approach of using the average trait value across both  
273 land-use types. The *b*, *c*, and *REI* values estimated from Mordecai *et al.* (2017) were compared  
274 between land-use types using Mann-Whitney U tests. The effect of land-use on vectorial capacity  
275 estimates was then explored using linear models, with land-use and sampling year as predictors.  
276 Relative vectorial capacity estimates were compared using a Mann-Whitney U test.

277

## 278 2.8 Ethical Statement

279 The use of HLCs was approved by the ethical committee of the Ministry of Health in Malaysia  
280 (Approval Number: NMRR-17-3242-39250, Issued: 13 March 2018), and the Imperial College  
281 London Research Ethics Committee (ICREC Reference: 17IC3799, Issued: 22/02/17).

282

## 283 3. Results

### 284 3.1 Human landing catches

285 A total of 276 *Ae. albopictus* mosquitoes were collected from 46 HLC surveys in 2017 and 22  
286 surveys in 2018. Male mosquitoes typically arrived first, and made up 19–58 % of the collections  
287 at each site (Table 2). However, this is likely an underestimate of the number of males swarming  
288 as only those that landed on the collectors were counted. The number of female mosquitoes  
289 collected per day ranged from 1–6 in logged forest and 1–15 in plantations, and were not

290 significantly different between sampling years (GLM,  $RR = 0.01$ ,  $df = 64$ , 95% CI:  $-0.29, 0.31$ ,  $p$   
291  $= 0.9$ ). Overall, human landing catches conducted in plantations yielded an average 1.5 times  
292 more mosquitoes per session than those at logged forest sites (GLM,  $RR = 0.42$ ,  $df = 64$ , 95% CI:  
293  $1.17, 2.0$ ,  $p = 0.002$ ). The mean number of mosquitoes collected per session was  $3.59 \pm 0.27$  (SE)  
294 in logged forest, and  $5.48 \pm 0.65$  (SE) in plantation sites. The proportion of parous mosquitoes  
295 was not significantly different between land-use types (GLM,  $F_{1,6} = 0.2$ ,  $p = 0.69$ ) or sampling  
296 years (GLM,  $F_{1,5} = 0.98$ ,  $p = 0.37$ ). Parity rates were highly variable within sites, with both the  
297 highest value in 2017, and the lowest value in 2018, observed at the same site ( $0.90$  and  $0.70$ ,  
298 respectively).

299

### 300 3.2 Adult survival and temperature-dependent transmission

301 Gonotrophic cycle length did not differ between logged forest and oil palm plantation  
302 treatments (Mann-Whitney U,  $Z = -0.99$ ,  $n = 83$ ,  $p = 0.33$ ), averaging  $8.24 \pm 3.2$  ( $\pm$ SD) days. As  
303 neither gonotrophic cycle length nor parity rate differed significantly between land-use types,  
304 the median value across all sites was used to estimate adult survival ( $S$ ) in both land-use types.  
305 Daily probability of adult mortality ( $\mu$ ) was then taken as  $1 - S$ , and estimated to be  $0.03 \pm$   
306  $0.006$  (SE) for all sites, corresponding to an estimated adult lifespan of  $33.3 \pm 57$  (SE) days.  
307 Biting rate was taken as the inverse of the median gonotrophic cycle length, and set as  $0.12$  for  
308 all sites.

309

310 **Table 2. Human landing catch data.** Sampling sites are listed along with the number of  
311 sampling days per site ( $n$ ). For the proportion of parous females,  $n$  indicates the total number of  
312 females for which parity status could be determined.

| Year | Land-use type | Sampling site (n) | Total number of females/males | Mean number of females per day (95% CI) | Proportion parous (n) |
|------|---------------|-------------------|-------------------------------|-----------------------------------------|-----------------------|
|------|---------------|-------------------|-------------------------------|-----------------------------------------|-----------------------|

|      |               |           |       |                 |           |
|------|---------------|-----------|-------|-----------------|-----------|
| 2017 | Oil palm      | OPK1 (11) | 76/22 | 6.91 (4.1, 9.7) | 0.90 (44) |
|      |               | OPSB (8)  | 32/25 | 4.57 (2.5, 5.5) | 0.75 (18) |
|      | Logged forest | SAFE (18) | 58/14 | 3.22 (2.1, 7.0) | 0.80 (41) |
|      |               | SWML (5)  | 28/13 | 4.00 (2.7, 5.3) | 0.82 (11) |
| 2018 | Oil palm      | OPK1 (6)  | 28/38 | 4.67 (2.3, 7.0) | 0.70 (20) |
|      |               | OPSB (5)  | 23/9  | 5.75 (0.03, 12) | 0.72 (18) |
|      | Logged forest | SAFE (6)  | 38/7  | 4.75 (3.5, 7.0) | 0.76 (37) |
|      |               | SWML (5)  | 9/10  | 2.25 (0.7, 3.8) | 0.89 (9)  |

313

314

315 Temperature data indicated that although mean daily temperatures did not differ significantly  
 316 between land-use types during the sampling period, daily temperature fluctuations were greater  
 317 in oil palm plantations than in logged forest (Gregory *et al.* 2019). Despite warmer temperatures  
 318 in plantation sites, none of the parameters estimated using the temperature-dependent  
 319 responses from Mordecai *et al.* (2017) differed significantly between the land-use types for  
 320 either sampling year (Wilcox,  $Z=0.43$ ,  $p = 0.663$ ; Fig 1). The probability of dengue transmission  
 321 from an infectious mosquito to a susceptible human ( $b$ ) was estimated to be  $0.501 \pm 0.01$  in  
 322 logged forest and  $0.503 \pm 0.012$  (mean  $\pm$  SE) in oil palm. Human to mosquito transmission  
 323 probability ( $c$ ) was estimated to be 0.762 in both logged forest and oil palm, with marginally  
 324 greater variation in the latter (logged forest SE = 0.005, oil palm SE = 0.008). The rate of  
 325 extrinsic incubation ( $REI$ ) was also the same in logged forest and oil palm, and estimated to be  
 326  $0.155 \pm 0.01$ .

327 Vectorial capacity was found to be 1.5 times greater in oil palm plantations ( $1.51 \pm 0.03$ , mean  $\pm$   
 328 SE) than in logged forest ( $0.99 \pm 0.01$ , mean  $\pm$  SE;  $F(1,4) = 61$ ,  $\beta = 0.50$ ,  $p < 0.001$ ) and did not  
 329 differ significantly between sampling years ( $\beta = -0.005$ ,  $p = 0.93$ ). The higher vectorial capacity  
 330 in oil palm plantations was driven by greater mosquito density ( $m$ ) at plantation sites, as  $rVC$

331 estimates did not differ significantly between land-use types (Wilcox,  $W = 6.5$ ,  $Z = 0.06$ ,  $p =$   
332  $0.77$ ).

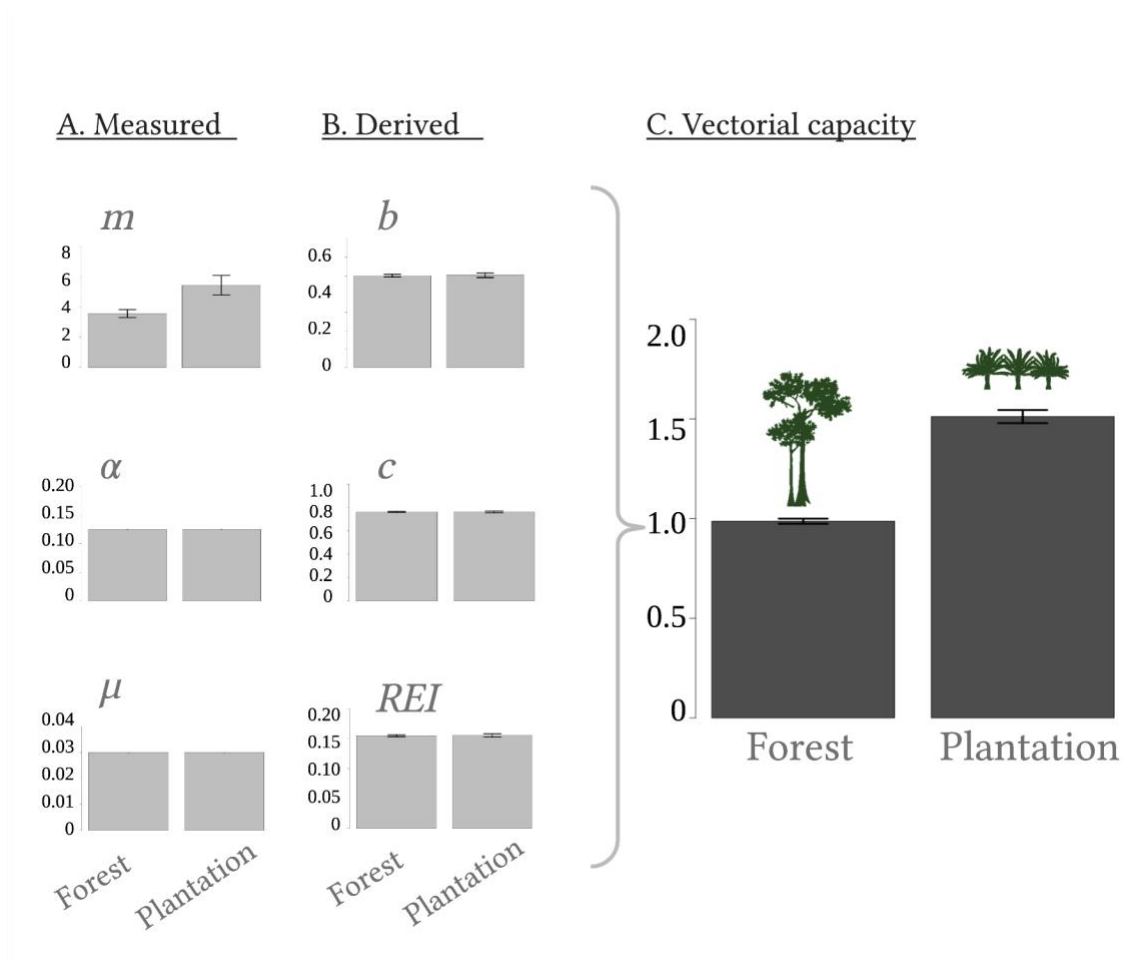

333

334

335 **Fig 1. Effects of land-use on vectorial capacity.** Estimates derived from temperature-dependent trait  
336 responses and data measured in the field are shown for each parameter underlying vectorial capacity (VC)  
337 for 2017. These are vector to human ratio ( $m$ ), daily probability of a female mosquito taking a bloodmeal  
338 ( $a$ ), the daily probability of adult mortality ( $\mu$ ), the probability of transmission from an infectious mosquito  
339 to a susceptible human ( $b$ ), the probability of transmission from an infectious human to susceptible  
340 mosquito ( $c$ ), and the rate of extrinsic incubation of the pathogen ( $REI$ ). Created with BioRender.com

341



### 342 3.3 Effects of adult mortality and biting rate on vectorial capacity

343 We found that holding all other parameters constant, if adult mortality was equal in logged forest  
344 and oil palm plantations, vectorial capacity would always be higher in plantations (Fig 2A), with  
345 the difference increasing exponentially with decreasing mortality rate. Given field estimates of  
346 adult mortality in oil palm plantations ( $\mu = 0.03$ ), vectorial capacity in logged forest could only  
347 exceed that in plantations if mortality in forests was lower than 0.02. This would translate to an  
348 adult lifespan of 50 days, compared to 33 days in oil palm. Calculating  $rVC$  with equal mortality  
349 between the sites demonstrates that  $rVC$  will not differ significantly between the land-use types  
350 within the range of most mosquito lifespans ( $\mu < 0.007$ , or a lifespan  $< 140$  days; Wilcox,  $W =$   
351  $42180$ ,  $Z = -21.2$ ,  $p = 0.72$ ). Similarly, we found that given equal biting rates in forest and  
352 plantation, vectorial capacity will always be greater in the latter (Fig 2B). Given our biting rate  
353 estimate of 0.125, or once every 8 days, vectorial capacity in forest will only exceed that in oil palm  
354 at 0.23, or a frequency of every four days. When calculated from thermal performance curves,  
355 biting rates were estimated to increase by 50% compared to estimates derived from laboratory  
356 data on gonotrophic cycle length, and did not differ significantly between land-use types (Wilcox,  
357  $Z = -1.55$ ,  $p = 0.13$ ). Holding all other parameters constant, we found that this increase in biting  
358 rate resulted in a four-fold increase in vectorial capacity for both logged forest and oil palm  
359 plantation sites.

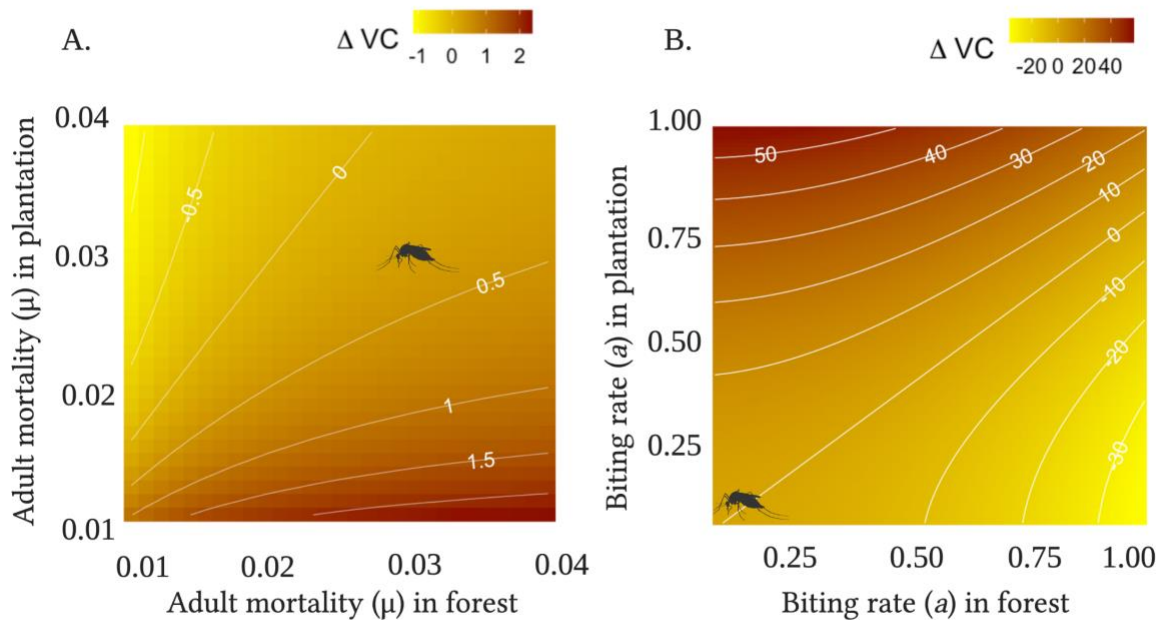

360

361 **Fig 2. Effects of adult mortality (A) and biting rate (B) on vectorial capacity.** Contour plot of  
362 differences in vectorial capacity estimates between oil palm plantations and logged forest, with positive  
363 values of  $\Delta VC$  denoting higher vectorial capacity in oil palm plantation and negative values denoting  
364 higher vectorial capacity in logged forest. As you move along the x-axis, the respective traits increase in  
365 logged forest, and the same applies for oil palm plantation along the y-axis. The mosquito icon indicates  
366 the value of the trait observed from the empirical data.

367

#### 368 4. Discussion

369 The advantages of using mechanistic models for understanding the impacts of environmental  
370 change on mosquito-borne disease dynamics have been demonstrated in a number of studies (7,  
371 8, 50). A key limitation to the development of these frameworks has been a lack of field data for  
372 model parameterization. By integrating fine-scale field data and temperature-dependent

373 estimates from the literature into a mathematical framework for transmission potential, our study  
374 furthers progress in this area in three key ways.

375 First, in contrast with studies that use coarse, aggregated temperature data or that simulate  
376 diurnal temperature to investigate the impacts of environmental change on mosquito traits, we  
377 measured fine-scale temperature at field sites where mosquito data were collected. Second, we  
378 account for non-linear thermal trait responses and incorporate diurnal temperature fluctuations  
379 in trait estimates. Finally, we parameterize our vectorial capacity model using field data on two  
380 crucial and challenging to measure parameters: adult abundance and survival.

381 We estimated the vectorial capacity of *Ae. albopictus* mosquitoes in oil palm plantations to be 1.5  
382 times that of those in logged forests; a result driven by a greater mosquito abundance in  
383 plantations. The observation that *Ae. albopictus* abundance increases in disturbed habitats is  
384 supported by previous empirical work conducted in the region (38, 39, 54), and reflects the well-  
385 established ecological plasticity of the species (41). This increased abundance was not estimated  
386 from TPCs, as diurnal temperatures did not differ sufficiently between habitat types to produce  
387 divergent responses in the underlying demographic traits. However, our temperature data  
388 contrast with a number of other studies, which have found mean temperatures in plantations to  
389 be up to 4°C warmer than in logged forests (30, 55). Microclimates vary significantly through the  
390 forest to plantation conversion timeline, and as plantations mature, leaf litter and canopy cover  
391 increases, buffering microclimates (55). Our observations that mean temperatures did not differ  
392 significantly between sites is thus likely due to selection of older plantations and significantly  
393 degraded forest, and it's possible that using temperature data from a wider range of forest and  
394 plantation sites to drive our model may have produced different estimates for abundance and  
395 vectorial capacity.

396 An additional consideration is that, although the broad temperatures sampled in this study  
397 represent the temperatures experienced by mosquitoes more accurately than those derived from

398 weather station and remotely sensed data, in reality an even wider range of microclimates are  
399 available at fine spatial scales (56). Behavioural avoidance of unsuitable temperatures by  
400 mosquitoes may further mediate the relationship between mosquito traits and ambient  
401 temperature. Although typically constrained to small bodies of water, mosquito larvae may move  
402 up and down between warmer and cooler layers of water, and adults may simply move away from  
403 extreme temperatures (57). Experimental studies that characterize fine-scale behavioural  
404 thermoregulation of mosquitoes remain limited, however a study of *Anopheles gambiae* found  
405 that, given access to range of temperatures, almost half of the mosquitoes consistently selected  
406 resting sites within 24-27°C, suggesting some capacity for behavioural thermoregulation (58).  
407 Further experimental work would contribute significantly to our understanding of their realized  
408 thermal niche. In the meantime, assessing the effects of temperature on mosquito traits may thus  
409 benefit from a temperature envelope approach, whereby the distribution of temperatures are used  
410 to evaluate trait responses rather than a single measure per unit time (59).

411 The characterisation of *Ae. albopictus* thermal responses has advanced mechanistic efforts to  
412 understand temperature-pathogen transmission relationships, however an important caveat to  
413 consider is that these relationships are produced under constant laboratory conditions, using a  
414 variety of laboratory-adapted mosquito strains (20). Key features of thermal responses curves are  
415 often adapted to local climatic conditions (60), and curves aggregated across a range of different  
416 mosquito strains, as well as number of laboratory generations, may obscure fine-scale variation  
417 in trait responses. In one study, *Ae. albopictus* adults collected across an urbanization gradient in  
418 Malaysia exhibited considerable variation in survival, with urban strains surviving approximately  
419 one week longer than rural strains, and two weeks longer than laboratory strains under  
420 standardised conditions (61). In a previous study conducted at these same field sites, we found  
421 that differences in daily temperature fluctuations resulted in faster larval development rates in oil  
422 palm plantations (62), an effect not predicted by published TPCs. Accurately characterising  
423 thermal response curves is particularly important given their asymmetric nature. A temperature

424 higher than the thermal optimum depresses fitness more than a temperature displaced an  
425 equivalent amount below the thermal optimum (63), meaning that even small shifts in the shape  
426 and distribution of key features (e.g. thermal optimum) can dramatically alter how temperature  
427 fluctuations are predicted to impact trait performance. This explains the similarity of our  
428 temperature-dependent trait estimates, as the daily temperature fluctuations at our sites are small  
429 relative to those defining the operational range of *Ae. albopictus*. For example, the thermal  
430 optimum for biting rate is approximately 33 °C (20), which is warmer than the maximum  
431 temperatures in both oil palm and logged forest sites. Below the thermal optimum, temperature-  
432 dependent trait performance approximates a linear response, thus, small differences in daily  
433 temperature fluctuation are not sufficient to produce significant differences in estimated trait  
434 performance.

435 By focusing solely on temperature-dependent responses, our vectorial capacity estimates ignore  
436 some potentially important sources of ecological variation between land-use types. For example,  
437 as forest conversion to oil palm plantation reduces invertebrate diversity and abundance (64, 65),  
438 predation and competition may also be reduced. Additionally, the homogenisation of vegetation  
439 associated with monoculture may reduce breeding habitats by removing trees, but may also  
440 increase the availability of artificial breeding sites due to increases in human activity. Although  
441 we can only speculate as to the relative impact of these factors, our empirical data suggest that at  
442 least one key trait, survival, does not differ significantly between land-use types.

443 In our modest sample of host-seeking female mosquitoes, we did not observe differences in parity  
444 rates among habitat types. Overall parity rates were high across the sites, which we cautiously  
445 interpret as indicative of older host-seeking mosquito populations. However, when we used  
446 gonotrophic cycle length to calculate lifespan, we estimated that mosquitoes only live for  
447 approximately 33 days. We believe this may be an overestimate for two reasons: 1) although our  
448 data did not indicate an effect of temperature fluctuations on gonotrophic cycle length, a number

449 of laboratory and field studies have found this trait to be temperature sensitive (10, 14, 25), and  
450 2) we were only able to measure the first gonotrophic cycle length, which can be twice as long as  
451 subsequent cycles (66). Shorter gonotrophic cycles would affect vectorial capacity estimates by  
452 decreasing calculated survival and increasing biting rate. For example, halving the gonotrophic  
453 cycle would result in a 95 % decrease in vectorial capacity due to effects on the probability of  
454 surviving the extrinsic incubation period. However, in this scenario biting rate would increase by  
455 50 %. Together these changes in survival and biting rate estimates would reduce vectorial capacity  
456 by ~52%. Though ubiquitous, the use of gonotrophic cycle length to infer biting rates introduces  
457 an additional source of uncertainty, as Aedine mosquitoes are frequently observed taking multiple  
458 bloodmeals within a cycle (67-69). As biting rate is raised to the power of 2 in the vectorial capacity  
459 equation, small changes in this parameter can result in relatively large changes in transmission  
460 intensity. Sensitivity analyses suggests that our results are robust to uncertainties in survival and  
461 biting rate estimates, however further sampling is needed to understand how these traits vary  
462 over space and time.

463 Despite the dominant role of oil palm plantation expansion on deforestation in Malaysia's Borneo  
464 states, few studies have explicitly investigated the impacts on mosquito vectors. To our  
465 knowledge, this study represents the first attempt to mechanistically characterise the effects of  
466 tropical forest conversion on the vectorial capacity of *Ae. albopictus*. Our finding that vectorial  
467 capacity increases in plantations highlights the need to more critically evaluate the increased risk  
468 of *Aedes*-borne disease against the benefits of economic development. Borneo is a region that  
469 continues to experience rapid urbanisation, with many urban centers surrounded by forest, or  
470 strongly connected to forest via logging and palm oil transport routes. The region is endemic for  
471 all four dengue serotypes, and has experienced an increasing number of dengue cases in recent  
472 years. In 2018, a total of 3,423 dengue cases were reported from Sabah, a substantial increase  
473 from the 2,560 cases in the year previous (Murphy et al. 2019), and Chikungunya has also recently  
474 re-emerged in the region (AbuBakar et al. 2007). *Ae. albopictus* is suspected to be the dominant

475 vector of both arboviruses in the region (Murphy *et al.* 2019). Increasing urbanisation in Borneo  
476 may present an additional risk to human health, in that human exposure to circulating sylvatic  
477 arboviruses likely increases at the forest interface. The evolutionary histories of dengue and  
478 Chikungunya viruses represent a cautionary tale, highlighting the potentially devastating  
479 consequences of disease spillover from sylvatic to human cycles (70). Given their propensity for  
480 zoophily, their competence for a number of arboviruses, and their capacity to thrive in both  
481 converted and forested areas, *Ae. albopictus* is an obvious candidate for facilitating contacts with  
482 enzootic cycles and increasing the risk of spillover events. In Borneo, this has already occurred  
483 with Anopheline vectors and the simian malaria, *Plasmodium knowlesi*, for which disease risk is  
484 closely linked to proximity to forest (Grigg *et al.* 2014; Fornace *et al.* 2016), and to a lesser extent,  
485 for some sylvatic dengue strains (71). The effects of land-use change on vector-borne disease risk  
486 will be an emergent property of interactions between host and vector ecology, behaviour,  
487 physiology and immunity and their idiosyncratic responses to change.

488  
489 Current understanding of mosquito biology stems largely from studies evaluating specific control  
490 interventions, which has left significant knowledge gaps in fundamental mosquito ecology (72).  
491 Mechanistic models, which will play a crucial role in predicting disease transmission dynamics  
492 under changing land-use and climate depend heavily on the accuracy of the underlying  
493 parameters. As such, there is a need to invest in studies that characterise mosquito ecology, as  
494 well as evaluate how they vary in space and time (5). This is particularly important for many  
495 *Aedes*-borne pathogens, for which disease control is currently entirely dependent on management  
496 of complex and dynamic vector populations.

497

498

499

500 5. Acknowledgments

501 This study was supported by an Imperial College London Grantham Institute for Climate Change  
502 Research Science and Solutions for a Changing Planet doctoral training program (SSCP DTP)  
503 studentship awarded to NG, and Sime Darby Foundation funding to the SAFE Project. Permission  
504 to conduct research was provided by the Sabah Biodiversity Council, Yayasan Sabah, Maliau Basin  
505 Management Committee (Licence Ref. No.: JKM/MBS.1000-2/2 JLD.4 (174)), and the Southeast  
506 Asia Rainforest Research Partnership (SEARRP). Logistical support was provided by the SAFE  
507 project coordinator, Ryan Gray, and the fieldwork support by the SAFE project field staff.

508

509

510

511



512

513 References:

- 514 1. Patz JA, Graczyk TK, Geller N, Vittor AY. Effects of environmental change on emerging  
515 parasitic diseases. *International journal for parasitology*. 2000;30(12):1395-405.
- 516 2. Parham PE, Waldock J, Christophides GK, Hemming D, Augusto F, Evans KJ, et al.  
517 Climate, environmental and socio-economic change: weighing up the balance in vector-borne  
518 disease transmission. *Philosophical Transactions of the Royal Society of London B: Biological  
519 Sciences*. 2015;370(1665):20130551.
- 520 3. Medley KA. Niche shifts during the global invasion of the Asian tiger mosquito, *Aedes*  
521 *albopictus* Skuse (Culicidae), revealed by reciprocal distribution models. *Global Ecology and  
522 Biogeography*. 2010;19(1):122-33.
- 523 4. Fischer D, Thomas SM, Niemitz F, Reineking B, Beierkuhnlein C. Projection of climatic  
524 suitability for *Aedes albopictus* Skuse (Culicidae) in Europe under climate change conditions.  
525 *Global and Planetary Change*. 2011;78(1):54-64.
- 526 5. Cator LJ, Johnson LR, Mordecai EA, El Moustaid F, Smallwood TR, LaDeau SL, et al.  
527 The role of vector trait variation in vector-borne disease dynamics. *Frontiers in ecology and  
528 evolution*. 2020.
- 529 6. Garrett-Jones C. The prognosis for interruption of malaria transmission through  
530 assessment of the mosquito's vectorial capacity. 1964.
- 531 7. Mordecai EA, Paaijmans KP, Johnson LR, Balzer C, Ben - Horin T, Moor E, et al.  
532 Optimal temperature for malaria transmission is dramatically lower than previously predicted.  
533 *Ecology letters*. 2013;16(1):22-30.
- 534 8. Johnson LR, Ben-Horin T, Lafferty KD, McNally A, Mordecai E, Paaijmans KP, et al.  
535 Understanding uncertainty in temperature effects on vector - borne disease: a Bayesian  
536 approach. *Ecology*. 2015;96(1):203-13.
- 537 9. Huey RB, Berrigan D. Temperature, demography, and ectotherm fitness. *The American  
538 Naturalist*. 2001;158(2):204-10.
- 539 10. Delatte H, Gimonneau G, Triboire A, Fontenille D. Influence of temperature on  
540 immature development, survival, longevity, fecundity, and gonotrophic cycles of *Aedes*  
541 *albopictus*, vector of chikungunya and dengue in the Indian Ocean. *Journal of medical  
542 entomology*. 2009;46(1):33-41.

- 543 11. Bayoh M, Lindsay S. Effect of temperature on the development of the aquatic stages of  
544 *Anopheles gambiae sensu stricto* (Diptera: Culicidae). *Bulletin of entomological research*.  
545 2003;93(05):375-81.
- 546 12. Mohammed A, Chadee DD. Effects of different temperature regimens on the  
547 development of *Aedes aegypti* (L.)(Diptera: Culicidae) mosquitoes. *Acta tropica*. 2011;119(1):38-  
548 43.
- 549 13. Rúa GL, Quiñones ML, Vélez ID, Zuluaga JS, Rojas W, Poveda G, et al. Laboratory  
550 estimation of the effects of increasing temperatures on the duration of gonotrophic cycle of  
551 *Anopheles albimanus* (Diptera: Culicidae). *Memorias Do Instituto Oswaldo Cruz*.  
552 2005;100(5):515-20.
- 553 14. Afrane YA, Lawson BW, Githeko AK, Yan G. Effects of microclimatic changes caused by  
554 land use and land cover on duration of gonotrophic cycles of *Anopheles gambiae* (Diptera:  
555 Culicidae) in western Kenya highlands. *Journal of medical entomology*. 2005;42(6):974-80.
- 556 15. Kramer LD, Hardy JL, Presser SB. Effect of temperature of extrinsic incubation on the  
557 vector competence of *Culex tarsalis* for western equine encephalomyelitis virus. *The American*  
558 *journal of tropical medicine and hygiene*. 1983;32(5):1130-9.
- 559 16. Turell MJ. Effect of environmental temperature on the vector competence of *Aedes*  
560 *taeniorhynchus* for Rift Valley fever and Venezuelan equine encephalitis viruses. *The American*  
561 *journal of tropical medicine and hygiene*. 1993;49(6):672-6.
- 562 17. Chamberlain R, Sudia WD. The effects of temperature upon the extrinsic incubation of  
563 eastern equine encephalitis in mosquitoes. *American journal of hygiene*. 1955;62(3).
- 564 18. Rohani A, Wong Y, Zamre I, Lee H, Zurainee M. The effect of extrinsic incubation  
565 temperature on development of dengue serotype 2 and 4 viruses in *Aedes aegypti* (L.). *Southeast*  
566 *Asian Journal of Tropical Medicine and Public Health*. 2009;40(5):942.
- 567 19. Franklins LH, Jones KE, Redding DW, Abubakar I. The effect of global change on  
568 mosquito-borne disease. *The Lancet Infectious Diseases*. 2019.
- 569 20. Mordecai EA, Cohen JM, Evans MV, Gudapati P, Johnson LR, Lippi CA, et al. Detecting  
570 the impact of temperature on transmission of Zika, dengue, and chikungunya using mechanistic  
571 models. *PLoS neglected tropical diseases*. 2017;11(4):e0005568.
- 572 21. Murdock CC, Evans MV, McClanahan TD, Miazgowicz KL, Tesla B. Fine-scale variation  
573 in microclimate across an urban landscape shapes variation in mosquito population dynamics  
574 and the potential of *Aedes albopictus* to transmit arboviral disease. *PLoS neglected tropical*  
575 *diseases*. 2017;11(5):e0005640.

- 576 22. Mordecai EA, Caldwell JM, Grossman MK, Lippi CA, Johnson LR, Neira M, et al.  
577 Thermal biology of mosquito - borne disease. *Ecology letters*. 2019;22(10):1690-708.
- 578 23. Tun - Lin W, Burkot T, Kay B. Effects of temperature and larval diet on development  
579 rates and survival of the dengue vector *Aedes aegypti* in north Queensland, Australia. *Medical*  
580 *and veterinary entomology*. 2000;14(1):31-7.
- 581 24. Alto BW, Juliano SA. Temperature effects on the dynamics of *Aedes albopictus* (Diptera:  
582 Culicidae) populations in the laboratory. *Journal of medical entomology*. 2001;38(4):548-56.
- 583 25. Carrington LB, Seifert SN, Willits NH, Lambrechts L, Scott TW. Large diurnal  
584 temperature fluctuations negatively influence *Aedes aegypti* (Diptera: Culicidae) life-history  
585 traits. *Journal of medical entomology*. 2013;50(1):43-51.
- 586 26. Paaijmans KP, Blanford S, Bell AS, Blanford JI, Read AF, Thomas MB. Influence of  
587 climate on malaria transmission depends on daily temperature variation. *Proceedings of the*  
588 *National Academy of Sciences*. 2010;107(34):15135-9.
- 589 27. Lambrechts L, Paaijmans KP, Fansiri T, Carrington LB, Kramer LD, Thomas MB, et al.  
590 Impact of daily temperature fluctuations on dengue virus transmission by *Aedes aegypti*.  
591 *Proceedings of the National Academy of Sciences*. 2011;108(18):7460-5.
- 592 28. Paaijmans KP, Blanford S, Chan BH, Thomas MB. Warmer temperatures reduce the  
593 vectorial capacity of malaria mosquitoes. *Biology letters*. 2011:rsbl20111075.
- 594 29. Jucker T, Hardwick SR, Both S, Elias DM, Ewers RM, Milodowski DT, et al. Canopy  
595 structure and topography jointly constrain the microclimate of human - modified tropical  
596 landscapes. *Global change biology*. 2018;24(11):5243-58.
- 597 30. Hardwick SR, Toumi R, Pfeifer M, Turner EC, Nilus R, Ewers RM. The relationship  
598 between leaf area index and microclimate in tropical forest and oil palm plantation: forest  
599 disturbance drives changes in microclimate. *Agricultural and Forest Meteorology*. 2015;201:187-  
600 95.
- 601 31. Blonder B, Both S, Coomes D, Elias D, Jucker T, Kvasnica J, et al. Extreme and highly  
602 heterogeneous microclimates in selectively logged tropical forests. *Frontiers in Forests and*  
603 *Global Change*. 2018;1:5.
- 604 32. Dong J, Xiao X, Sheldon S, Biradar C, Zhang G, Duong ND, et al. A 50-m forest cover  
605 map in Southeast Asia from ALOS/PALSAR and its application on forest fragmentation  
606 assessment. *PloS one*. 2014;9(1):e85801.
- 607 33. Laurance WF, Sayer J, Cassman KG. Agricultural expansion and its impacts on tropical  
608 nature. *Trends in ecology & evolution*. 2014;29(2):107-16.

- 609 34. Shah S, Abbas G, Riaz N, ur Rehman A, Hanif M, Rasool MF. Burden of communicable  
610 diseases and cost of illness: Asia pacific region. *Expert Review of Pharmacoeconomics &*  
611 *Outcomes Research*. 2020.
- 612 35. Fitzherbert EB, Struebig MJ, Morel A, Danielsen F, Brühl CA, Donald PF, et al. How will  
613 oil palm expansion affect biodiversity? *Trends in ecology & evolution*. 2008;23(10):538-45.
- 614 36. Koh LP, Wilcove DS. Cashing in palm oil for conservation. *Nature*. 2007;448(7157):993-  
615 4.
- 616 37. Gaveau DL, Sheil D, Husnayaen MAS, Arjasakusuma S, Ancrenaz M, Pacheco P, et al.  
617 Rapid conversions and avoided deforestation: examining four decades of industrial plantation  
618 expansion in Borneo. *Scientific Reports*. 2016;6.
- 619 38. Young KI, Mundis S, Widen SG, Wood TG, Tesh RB, Cardoso J, et al. Abundance and  
620 distribution of sylvatic dengue virus vectors in three different land cover types in Sarawak,  
621 Malaysian Borneo. *Parasites & Vectors*. 2017;10(1):406.
- 622 39. Chang M, Hii J, Buttner P, Mansoor F. Changes in abundance and behaviour of vector  
623 mosquitoes induced by land use during the development of an oil palm plantation in Sarawak.  
624 *Transactions of the Royal Society of Tropical Medicine and Hygiene*. 1997;91(4):382-6.
- 625 40. Murphy A, Rajahram GS, Jilip J, Maluda M, William T, Hu W, et al. Spatial and  
626 epidemiologic features of dengue in Sabah, Malaysia. *BioRxiv*. 2019:657031.
- 627 41. Paupy C, Delatte H, Bagny L, Corbel V, Fontenille D. *Aedes albopictus*, an arbovirus  
628 vector: from the darkness to the light. *Microbes and Infection*. 2009;11(14):1177-85.
- 629 42. Delatte H, Desvars A, Bouétard A, Bord S, Gimonneau G, Vourc'h G, et al. Blood-feeding  
630 behavior of *Aedes albopictus*, a vector of Chikungunya on La Réunion. *Vector-Borne and*  
631 *Zoonotic Diseases*. 2010;10(3):249-58.
- 632 43. WHO. Dengue Situation Update Number 584. World Health Organization 2019.
- 633 44. Nani R. Dengue incidence and the prevention and control program in Malaysia. 2015.
- 634 45. Ewers RM, Didham RK, Fahrig L, Ferraz G, Hector A, Holt RD, et al. A large-scale forest  
635 fragmentation experiment: the Stability of Altered Forest Ecosystems Project. *Philosophical*  
636 *Transactions of the Royal Society of London B: Biological Sciences*. 2011;366(1582):3292-302.
- 637 46. Walsh RP. Drought frequency changes in Sabah and adjacent parts of northern Borneo  
638 since the late nineteenth century and possible implications for tropical rain forest dynamics.  
639 *Journal of Tropical Ecology*. 1996;12(3):385-407.
- 640 47. Pfeifer M, Kor L, Nilus R, Turner E, Cusack J, Lysenko I, et al. Mapping the structure of  
641 Borneo's tropical forests across a degradation gradient. *Remote Sensing of Environment*.  
642 2016;176:84-97.

- 643 48. Detinova TS. Age grouping methods in Diptera of medical importance with special  
644 reference to some vectors of malaria. *Age Grouping Methods in Díptera of Medical Importance*  
645 with special reference to some Vectors of Malaria. 1962.
- 646 49. Lardeux FJ, Tejerina RH, Quispe V, Chavez TK. A physiological time analysis of the  
647 duration of the gonotrophic cycle of *Anopheles pseudopunctipennis* and its implications for  
648 malaria transmission in Bolivia. *Malaria journal*. 2008;7(1):1-17.
- 649 50. Shocket MS, Verwillow AB, Numazu MG, Slamani H, Cohen JM, El Moustaid F, et al.  
650 Transmission of West Nile and five other temperate mosquito-borne viruses peaks at  
651 temperatures between 23° C and 26° C. *Elife*. 2020;9:e58511.
- 652 51. Parham PE, Michael E. Modeling the effects of weather and climate change on malaria  
653 transmission. *Environmental health perspectives*. 2009;118(5):620-6.
- 654 52. Murdock C, Sternberg E, Thomas M. Malaria transmission potential could be reduced  
655 with current and future climate change. *Scientific Reports*. 2016;6.
- 656 53. Worner SP. Performance of phenological models under variable temperature regimes:  
657 consequences of the Kaufmann or rate summation effect. *Environmental Entomology*.  
658 1992;21(4):689-99.
- 659 54. Brown R, Hing CT, Fornace K, Ferguson HM. Evaluation of resting traps to examine the  
660 behaviour and ecology of mosquito vectors in an area of rapidly changing land use in Sabah,  
661 Malaysian Borneo. *Parasites & vectors*. 2018;11(1):346.
- 662 55. Luskin MS, Potts MD. Microclimate and habitat heterogeneity through the oil palm  
663 lifecycle. *Basic and Applied Ecology*. 2011;12(6):540-51.
- 664 56. Jucker T, Jackson TD, Zellweger F, Swinfield T, Gregory N, Williamson J, et al. A  
665 research agenda for microclimate ecology in human-modified tropical forests. *Frontiers in*  
666 *Forests and Global Change*. 2020;2:92.
- 667 57. Kirby M, Lindsay S. Responses of adult mosquitoes of two sibling species, *Anopheles*  
668 *arabiensis* and *A. gambiae* ss (Diptera: Culicidae), to high temperatures. *Bulletin of*  
669 *Entomological Research*. 2004;94(5):441-8.
- 670 58. Blanford S, Read AF, Thomas MB. Thermal behaviour of *Anopheles stephensi* in  
671 response to infection with malaria and fungal entomopathogens. *Malaria Journal*. 2009;8(1):1-  
672 9.
- 673 59. Cator LJ, Thomas S, Paaijmans KP, Ravishankaran S, Justin JA, Mathai MT, et al.  
674 Characterizing microclimate in urban malaria transmission settings: a case study from Chennai,  
675 India. *Malaria journal*. 2013;12(1):84.

- 676 60. Sunday JM, Bates AE, Kearney MR, Colwell RK, Dulvy NK, Longino JT, et al. Thermal-  
677 safety margins and the necessity of thermoregulatory behavior across latitude and elevation.  
678 *Proceedings of the National Academy of Sciences*. 2014;111(15):5610-5.
- 679 61. Muhammad NAF, Abu Kassim NF, Ab Majid AH, Abd Rahman A, Dieng H, Avicor SW.  
680 Biting rhythm and demographic attributes of *Aedes albopictus* (Skuse) females from different  
681 urbanized settings in Penang Island, Malaysia under uncontrolled laboratory conditions. *Plos*  
682 *one*. 2020;15(11):e0241688.
- 683 62. Gregory N, Ewers RM, Chung AY, Cator LJ. El Niño drought and tropical forest  
684 conversion synergistically determine mosquito development rate. *Environmental Research*  
685 *Letters*. 2019;14(3):035003.
- 686 63. Martin TL, Huey RB. Why “suboptimal” is optimal: Jensen’s inequality and ectotherm  
687 thermal preferences. *The American Naturalist*. 2008;171(3):E102-E18.
- 688 64. Ewers RM, Boyle MJ, Gleave RA, Plowman NS, Benedick S, Bernard H, et al. Logging  
689 cuts the functional importance of invertebrates in tropical rainforest. *Nature communications*.  
690 2015;6.
- 691 65. Fayle TM, Turner EC, Snaddon JL, Chey VK, Chung AY, Eggleton P, et al. Oil palm  
692 expansion into rain forest greatly reduces ant biodiversity in canopy, epiphytes and leaf-litter.  
693 *Basic and Applied Ecology*. 2010;11(4):337-45.
- 694 66. Löwenberg Neto P, Navarro-Silva MA. Development, longevity, gonotrophic cycle and  
695 oviposition of *Aedes albopictus* Skuse (Diptera: Culicidae) under cyclic temperatures.  
696 *Neotropical Entomology*. 2004;33(1):29-33.
- 697 67. dos Santos Andrade P, Urbinatti PR, da Rocha Coelho R, de Sá Almeida RMM, Ribeiro  
698 SS, de Lima - Camara TN. Parity and gonotrophic discordance of females of *Aedes aegypti* and  
699 *Aedes albopictus* (Diptera: Culicidae) in the city of São Paulo, SP, Brazil. *Journal of Vector*  
700 *Ecology*. 2019;44(2):233-40.
- 701 68. Scott TW, Clark GG, Lorenz LH, Amerasinghe PH, Reiter P, Edman JD. Detection of  
702 multiple blood feeding in *Aedes aegypti* (Diptera: Culicidae) during a single gonotrophic cycle  
703 using a histologic technique. *Journal of Medical Entomology*. 1993;30(1):94-9.
- 704 69. Farjana T, Nobuko T. Multiple blood feeding and host-seeking behaviour in *Aedes*  
705 *aegypti* and *Aedes albopictus* (Diptera: Culicidae). *Journal of Medical Entomology*.  
706 2013;50(4):838-46.
- 707 70. Weaver S. Host range, amplification and arboviral disease emergence. *Infectious*  
708 *diseases from nature: Mechanisms of viral emergence and persistence*. 2005:33-44.

- 709 71. Vasilakis N, Cardoso J, Hanley KA, Holmes EC, Weaver SC. Fever from the forest:  
710 prospects for the continued emergence of sylvatic dengue virus and its impact on public health.  
711 Nature reviews Microbiology. 2011;9(7):532.
- 712 72. Ferguson HM, Dornhaus A, Beeche A, Borgemeister C, Gottlieb M, Mulla MS, et al.  
713 Ecology: a prerequisite for malaria elimination and eradication. 2010.
- 714
